# Supplementary material
Source: PubMed Central journal article supplement (PMC5460829)
Supplement: en.2016-1842.sd1.pdf [file en.2016-1842.sd1.pdf]

1

2

3

4

5

6

7

## Supplemental Data

### **A thyroid hormone based strategy for correcting the biochemical abnormality in X-linked adrenoleukodystrophy (X-ALD)**

8

Meredith D. Hartley<sup>1\*</sup>, Lisa L. Kirkemo<sup>1\*</sup>, Tapasree Banerji<sup>1</sup>, Thomas S. Scanlan<sup>1</sup>

9

<sup>1</sup>Department of Physiology and Pharmacology and Program in Chemical Biology, Oregon Health & Science University, 3181 SW Sam Jackson

10

Park Road, Portland, OR, 92739.

11

\*These authors contributed equally to this work.

12

12  
13  
14  
15  
16  
17  
18  
19  
20

**Supplemental Table 1.** Serum C26-LPC levels. For the short-term 7 day and 28 day experiments, the control mice were grouped together for statistical analysis due to high variability in C26-LPC levels in the control cohorts. The means of the two control groups were identical ( $106.5 \pm 12.5$  for 7 day and  $104.5 \pm 16.3$  for 28 day). Values represent mean  $\pm$  SEM. Statistical analysis is performed with pairwise two-tailed student t-tests with comparison to the control *Abcd1*(y/-) group and the exact P value is reported. In addition, statistical significance is determined by ANOVA analysis with Dunnett's post-test with comparisons to the control *Abcd1*(y/-) group in each experiment (NS = not significant P value  $> 0.05$ , \*P  $\leq 0.05$ , \*\*P  $< 0.01$ ).

|                                            | Duration     | N  | C26-LPC (ng/ $\mu$ L) | t-test P value | ANOVA analysis | Figure     |
|--------------------------------------------|--------------|----|-----------------------|----------------|----------------|------------|
| Wild type (C57BL6/J)                       | N/A          | 4  | $5.8 \pm 0.9$         | -              | -              | 2, 4, 6, 7 |
| Control <i>Abcd1</i> (y/-)                 | 7 day/28 day | 11 | $106.5 \pm 9.5$       | -              | -              | 2, 3       |
| Hypothyroid                                | 8 weeks      | 12 | $117.5 \pm 5.7$       | 0.28           | NS             | 2          |
| Hyperthyroid (1 mg/kg ip)                  | 7 day        | 6  | $55.7 \pm 4.5$        | 0.002          | **             | 2, 3       |
| Sobetirome (0.1 mg/kg ip)                  | 7 day        | 6  | $67.3 \pm 11.7$       | 0.03           | *              | 3          |
| Sobetirome (1.0 mg/kg ip)                  | 7 day        | 6  | $52.5 \pm 6.1$        | 0.002          | **             | 3          |
| Hyperthyroid (1 mg/kg ip)                  | 28 day       | 6  | $74.3 \pm 8.5$        | 0.04           | *              | 4          |
| Sobetirome (0.1 mg/kg ip)                  | 28 day       | 4  | $68.2 \pm 5.8$        | 0.04           | *              | 4          |
| Sobetirome (1.0 mg/kg ip)                  | 28 day       | 4  | $71.1 \pm 4.7$        | 0.05           | NS             | 4          |
| Control juvenile <i>Abcd1</i> (y/-) (chow) | 12 weeks     | 7  | $165.4 \pm 10.7$      | -              | -              | 6          |
| Hyperthyroid juvenile (4 mg/kg chow)       | 12 weeks     | 4  | $62.3 \pm 5.5$        | $<0.0001$      | **             | 6          |
| Sobetirome juvenile (0.4 mg/kg chow)       | 12 weeks     | 3  | $83.0 \pm 4.1$        | 0.0013         | **             | 6          |
| Sobetirome juvenile (2.0 mg/kg chow)       | 11 weeks     | 5  | $56.2 \pm 6.3$        | $<0.0001$      | **             | 6          |
| Sobetirome juvenile (0.4 mg/kg chow)       | 18 weeks     | 2  | $83.2 \pm 11.0$       | 0.007          | **             | 6          |
| Control adult <i>Abcd1</i> (y/-) (chow)    | 12 weeks     | 4  | $135.7 \pm 7.1$       | -              | -              | 7          |
| Hyperthyroid adult (4 mg/kg chow)          | 12 weeks     | 6  | $36.5 \pm 3.7$        | $<0.0001$      | **             | 7          |
| Sobetirome adult (0.4 mg/kg chow)          | 12 weeks     | 5  | $81.6 \pm 8.2$        | 0.002          | **             | 7          |
| Sobetirome adult (2.0 mg/kg chow)          | 11 weeks     | 7  | $44.5 \pm 2.6$        | $<0.0001$      | **             | 7          |

21  
22  
23

23 **Supplemental Table 2.** Adrenal gland total VLCFA levels. Values represent mean  $\pm$  SEM. Statistical analysis is performed with pairwise two-  
 24 tailed student t-tests with comparison to the control *Abcd1*(y/-) group and the exact P value is reported. In addition, statistical significance is  
 25 determined by ANOVA analysis with Dunnett's post-test with comparisons to the control *Abcd1*(y/-) group in each experiment (NS = not  
 26 significant P value > 0.05, \*P  $\leq$  0.05, \*\*P < 0.01).

27  
 28

|                                            | Duration | N  | C22 (ng/gland)   | C26 (ng/gland)   | C26/C22         | t test<br>P value | ANOVA<br>analysis<br>(C26/C22) | Figure     |
|--------------------------------------------|----------|----|------------------|------------------|-----------------|-------------------|--------------------------------|------------|
| Wild type (C57BL6/J)                       | N/A      | 6  | 99.1 $\pm$ 21.7  | 3.7 $\pm$ 0.8    | 0.04 $\pm$ 0.01 | -                 | -                              | 2, 4, 6, 7 |
| Control <i>Abcd1</i> (y/-)                 | 7 day    | 6  | 89.3 $\pm$ 14.2  | 94.6 $\pm$ 15.6  | 1.06 $\pm$ 0.05 | -                 | -                              | 2, 3       |
| Hypothyroid                                | 8 weeks  | 11 | 242.3 $\pm$ 15.7 | 356.5 $\pm$ 28.4 | 1.46 $\pm$ 0.05 | <0.0001           | **                             | 2          |
| Hyperthyroid (1 mg/kg ip)                  | 7 day    | 5  | 138.9 $\pm$ 62.0 | 114.8 $\pm$ 61.9 | 0.74 $\pm$ 0.09 | 0.009             | *                              | 2, 3       |
| Sobetirome (0.1 mg/kg ip)                  | 7 day    | 5  | 76.0 $\pm$ 17.2  | 70.2 $\pm$ 18.8  | 0.91 $\pm$ 0.11 | 0.24              | NS                             | 3          |
| Sobetirome (1.0 mg/kg ip)                  | 7 day    | 3  | 120.0 $\pm$ 18.4 | 92.6 $\pm$ 12.3  | 0.79 $\pm$ 0.13 | 0.05              | NS                             | 3          |
| Control <i>Abcd1</i> (y/-)                 | 28 day   | 5  | 139.4 $\pm$ 33.8 | 155 $\pm$ 39.1   | 1.12 $\pm$ 0.04 | -                 | -                              | 4          |
| Hyperthyroid (1 mg/kg ip)                  | 28 day   | 6  | 416.5 $\pm$ 39.9 | 328.1 $\pm$ 44.3 | 0.78 $\pm$ 0.05 | 0.0006            | **                             | 4          |
| Sobetirome (0.1 mg/kg ip)                  | 28 day   | 5  | 249.9 $\pm$ 40.7 | 231.7 $\pm$ 38.5 | 0.93 $\pm$ 0.06 | 0.03              | NS                             | 4          |
| Sobetirome (1.0 mg/kg ip)                  | 28 day   | 4  | 242.1 $\pm$ 64.7 | 223.8 $\pm$ 44.4 | 0.88 $\pm$ 0.04 | 0.006             | *                              | 4          |
| Control juvenile <i>Abcd1</i> (y/-) (chow) | 12 weeks | 9  | 65.8 $\pm$ 13.9  | 89.9 $\pm$ 16.0  | 1.55 $\pm$ 0.14 | -                 | -                              | 6          |
| Hyperthyroid juvenile (4 mg/kg chow)       | 12 weeks | 5  | 246.2 $\pm$ 21.7 | 100.4 $\pm$ 15.0 | 0.42 $\pm$ 0.07 | 0.0001            | **                             | 6          |
| Sobetirome juvenile (0.4 mg/kg chow)       | 12 weeks | 5  | 225.8 $\pm$ 10.4 | 167.7 $\pm$ 11.9 | 0.74 $\pm$ 0.02 | 0.002             | **                             | 6          |
| Sobetirome juvenile (2.0 mg/kg chow)       | 11 weeks | 5  | 287.8 $\pm$ 13.8 | 127.5 $\pm$ 13.5 | 0.44 $\pm$ 0.04 | 0.0001            | **                             | 6          |
| Sobetirome juvenile (0.4 mg/kg chow)       | 18 weeks | 2  | 222.0 $\pm$ 4.4  | 137.6 $\pm$ 2.7  | 0.62 $\pm$ 0.01 | 0.02              | **                             | 6          |
| Control adult <i>Abcd1</i> (y/-) (chow)    | 12 weeks | 4  | 116.4 $\pm$ 6.1  | 134.9 $\pm$ 3.4  | 1.17 $\pm$ 0.04 | -                 | -                              | 7          |
| Hyperthyroid adult (4 mg/kg chow)          | 12 weeks | 6  | 344.9 $\pm$ 56.5 | 186.1 $\pm$ 22.1 | 0.56 $\pm$ 0.04 | <0.0001           | **                             | 7          |
| Sobetirome adult (0.4 mg/kg chow)          | 12 weeks | 5  | 146.9 $\pm$ 37.0 | 171.4 $\pm$ 13.7 | 0.94 $\pm$ 0.05 | 0.02              | **                             | 7          |
| Sobetirome adult (2.0 mg/kg chow)          | 11 weeks | 7  | 302.1 $\pm$ 27.5 | 187.5 $\pm$ 12.2 | 0.63 $\pm$ 0.04 | <0.0001           | **                             | 7          |

29  
 30

30

31 **Supplemental Table 3.** Brain total VLCFA levels. Values represent mean  $\pm$  SEM. Statistical analysis is performed with pairwise two-tailed  
 32 student t-tests with comparison to the control *Abcd1(y/-)* group and the exact P value is reported. In addition, statistical significance is determined  
 33 by ANOVA analysis with Dunnett's post-test with comparisons to the control *Abcd1(y/-)* group in each experiment (NS = not significant P value >  
 34 0.05, \*P  $\leq$  0.05, \*\*P < 0.01).

35

|                                           | Duration | N  | C22<br>(ng/mg<br>tissue) | C26<br>(ng/mg<br>tissue) | C26/C22           | t-test<br>P value | ANOVA<br>analysis<br>(C26/C22) | Figure     |
|-------------------------------------------|----------|----|--------------------------|--------------------------|-------------------|-------------------|--------------------------------|------------|
| Wild type (C57BL6/J)                      | N/A      | 4  | 105.6 $\pm$ 12.1         | 1.7 $\pm$ 0.6            | 0.016 $\pm$ 0.006 | -                 | -                              | 2, 4, 6, 7 |
| Control <i>Abcd1(y/-)</i>                 | 7 day    | 6  | 153.4 $\pm$ 6.8          | 30.0 $\pm$ 1.2           | 0.196 $\pm$ 0.004 | -                 | -                              | 2, 3       |
| Hypothyroid                               | 8 weeks  | 13 | 129.7 $\pm$ 3.3          | 26.5 $\pm$ 1.4           | 0.204 $\pm$ 0.009 | 0.56              | NS                             | 2          |
| Hyperthyroid (1 mg/kg ip)                 | 7 day    | 6  | 150.8 $\pm$ 7.2          | 28.8 $\pm$ 1.7           | 0.190 $\pm$ 0.004 | 0.29              | NS                             | 2, 3       |
| Sobetirome (0.1 mg/kg ip)                 | 7 day    | 6  | 158.0 $\pm$ 7.8          | 29.4 $\pm$ 1.1           | 0.187 $\pm$ 0.003 | 0.09              | NS                             | 3          |
| Sobetirome (1.0 mg/kg ip)                 | 7 day    | 6  | 151.1 $\pm$ 5.7          | 28.3 $\pm$ 0.6           | 0.188 $\pm$ 0.004 | 0.14              | NS                             | 3          |
| Control <i>Abcd1(y/-)</i>                 | 28 day   | 5  | 118.3 $\pm$ 10.4         | 23.6 $\pm$ 2.3           | 0.199 $\pm$ 0.011 | -                 | -                              | 4          |
| Hyperthyroid (1 mg/kg ip)                 | 28 day   | 6  | 118.5 $\pm$ 5.9          | 22.7 $\pm$ 2.6           | 0.189 $\pm$ 0.017 | 0.64              | NS                             | 4          |
| Sobetirome (0.1 mg/kg ip)                 | 28 day   | 5  | 113.2 $\pm$ 6.6          | 23.7 $\pm$ 1.8           | 0.209 $\pm$ 0.005 | 0.46              | NS                             | 4          |
| Sobetirome (1.0 mg/kg ip)                 | 28 day   | 4  | 125.6 $\pm$ 0.9          | 24.3 $\pm$ 2.0           | 0.194 $\pm$ 0.150 | 0.77              | NS                             | 4          |
| Control juvenile <i>Abcd1(y/-)</i> (chow) | 12 weeks | 9  | 174.2 $\pm$ 9.4          | 31.6 $\pm$ 1.5           | 0.182 $\pm$ 0.002 | -                 | -                              | 6          |
| Hyperthyroid juvenile (4 mg/kg chow)      | 12 weeks | 5  | 189.2 $\pm$ 9.1          | 32.8 $\pm$ 1.3           | 0.174 $\pm$ 0.002 | 0.03              | NS                             | 6          |
| Sobetirome juvenile (0.4 mg/kg chow)      | 12 weeks | 5  | 203.8 $\pm$ 8.9          | 31.5 $\pm$ 0.9           | 0.155 $\pm$ 0.003 | <0.0001           | **                             | 6          |
| Sobetirome juvenile (2.0 mg/kg chow)      | 11 weeks | 5  | 198.2 $\pm$ 10.3         | 31.8 $\pm$ 1.5           | 0.161 $\pm$ 0.003 | <0.0001           | **                             | 6          |
| Sobetirome juvenile (0.4 mg/kg chow)      | 18 weeks | 2  | 193.9 $\pm$ 5.4          | 29.1 $\pm$ 0.9           | 0.150 $\pm$ 0.001 | <0.0001           | **                             | 6          |
| Control adult <i>Abcd1(y/-)</i> (chow)    | 12 weeks | 4  | 168.9 $\pm$ 3.0          | 35.3 $\pm$ 1.7           | 0.209 $\pm$ 0.006 | -                 | -                              | 7          |
| Hyperthyroid adult (4 mg/kg chow)         | 12 weeks | 6  | 157.9 $\pm$ 5.3          | 30.6 $\pm$ 0.8           | 0.194 $\pm$ 0.004 | 0.09              | NS                             | 7          |
| Sobetirome adult (0.4 mg/kg chow)         | 12 weeks | 5  | 162.8 $\pm$ 4.8          | 28.7 $\pm$ 1.3           | 0.176 $\pm$ 0.003 | 0.01              | **                             | 7          |
| Sobetirome adult (2.0 mg/kg chow)         | 11 weeks | 7  | 170.5 $\pm$ 1.8          | 31.5 $\pm$ 0.6           | 0.184 $\pm$ 0.002 | 0.002             | **                             | 7          |

36

37

37 **Supplemental Table 4.** Brain C26-LPC levels. Values represent mean  $\pm$  SEM. Statistical analysis is performed with pairwise two-tailed student t-  
38 tests with comparison to the control *Abcd1(y/-)* group and the exact P value is reported. In addition, statistical significance is determined by  
39 ANOVA analysis with Dunnett's post-test with comparisons to the control *Abcd1(y/-)* group in each experiment (NS = not significant P value >  
40 0.05, \*P  $\leq$  0.05, \*\*P < 0.01). The C26-LPC values in the brain were not determined for the short-term 28 day experiments.  
41

|                                           | Duration | N  | C26-LPC<br>(ng/mg<br>protein) | t-test<br>P value | ANOVA<br>analysis<br>(C26-LPC) | C26-LPC/C22         | t-test<br>P value | ANOVA<br>analysis<br>(C26-<br>LPC) | Figure     |
|-------------------------------------------|----------|----|-------------------------------|-------------------|--------------------------------|---------------------|-------------------|------------------------------------|------------|
| Wild type (C57BL6/J)                      | N/A      | 4  | 5.0 $\pm$ 0.3                 | -                 | -                              | 0.0011 $\pm$ 0.0001 | -                 | -                                  | 2, 4, 6, 7 |
| Control <i>Abcd1(y/-)</i>                 | 7 day    | 6  | 23.0 $\pm$ 4.4                | -                 | -                              | 0.0183 $\pm$ 0.0044 | -                 | -                                  | 2, 3       |
| Hypothyroid                               | 8 weeks  | 13 | 32.8 $\pm$ 1.5                | 0.02              | *                              | 0.0280 $\pm$ 0.0014 | 0.02              | *                                  | 2          |
| Hyperthyroid (1 mg/kg ip)                 | 7 day    | 6  | 23.2 $\pm$ 1.9                | 0.96              | NS                             | 0.0180 $\pm$ 0.0014 | 0.96              | NS                                 | 2, 3       |
| Sobetirome (0.1 mg/kg ip)                 | 7 day    | 6  | 28.9 $\pm$ 4.6                | 0.38              | NS                             | 0.0220 $\pm$ 0.0036 | 0.52              | NS                                 | 3          |
| Sobetirome (1.0 mg/kg ip)                 | 7 day    | 6  | 33.8 $\pm$ 7.0                | 0.22              | NS                             | 0.0248 $\pm$ 0.0049 | 0.34              | NS                                 | 3          |
| Control juvenile <i>Abcd1(y/-)</i> (chow) | 12 weeks | 9  | 24.0 $\pm$ 0.6                | -                 | -                              | 0.0100 $\pm$ 0.0003 | -                 | -                                  | 6          |
| Hyperthyroid juvenile (4 mg/kg chow)      | 12 weeks | 5  | 18.2 $\pm$ 1.1                | 0.0002            | **                             | 0.0090 $\pm$ 0.0006 | 0.17              | NS                                 | 6          |
| Sobetirome juvenile (0.4 mg/kg chow)      | 12 weeks | 5  | 20.9 $\pm$ 0.3                | 0.002             | *                              | 0.0073 $\pm$ 0.0006 | 0.0002            | **                                 | 6          |
| Sobetirome juvenile (2.0 mg/kg chow)      | 11 weeks | 5  | 19.9 $\pm$ 1.2                | 0.004             | **                             | 0.0073 $\pm$ 0.0004 | 0.0001            | **                                 | 6          |
| Sobetirome juvenile (0.4 mg/kg chow)      | 18 weeks | 2  | 19.0 $\pm$ 0.5                | 0.003             | **                             | 0.0071 $\pm$ 0.0001 | 0.004             | **                                 | 6          |
| Control adult <i>Abcd1(y/-)</i> (chow)    | 12 weeks | 4  | 31.6 $\pm$ 0.9                | -                 | -                              | 0.0127 $\pm$ 0.0004 | -                 | -                                  | 7          |
| Hyperthyroid adult (4 mg/kg chow)         | 12 weeks | 6  | 26.6 $\pm$ 0.3                | 0.0003            | **                             | 0.0116 $\pm$ 0.0004 | 0.07              | NS                                 | 7          |
| Sobetirome adult (0.4 mg/kg chow)         | 12 weeks | 5  | 25.9 $\pm$ 1.2                | 0.009             | **                             | 0.0109 $\pm$ 0.0003 | 0.008             | **                                 | 7          |
| Sobetirome adult (2.0 mg/kg chow)         | 11 weeks | 7  | 27.3 $\pm$ 0.7                | 0.005             | **                             | 0.0112 $\pm$ 0.0003 | 0.01              | **                                 | 7          |

42

42 **Supplemental Table 5.** Testes total VLCFA levels. Values represent mean  $\pm$  SEM. Statistical analysis is performed with pairwise two-tailed  
 43 student t-tests with comparison to the control *Abcd1(y/-)* group and the exact P value is reported. In addition, statistical significance is determined  
 44 by ANOVA analysis with Dunnett's post-test with comparisons to the control *Abcd1(y/-)* group in each experiment (NS = not significant P value >  
 45 0.05, \*P  $\leq$  0.05, \*\*P < 0.01).  
 46

|                                           | Duration | N | C22<br>(ng/mg<br>tissue) | C26<br>(ng/mg<br>tissue) | C26/C22           | t-test<br>P value | ANOVA<br>analysis | Figure |
|-------------------------------------------|----------|---|--------------------------|--------------------------|-------------------|-------------------|-------------------|--------|
| Wild type (C57BL6/J)                      | N/A      | 4 | 15.7 $\pm$ 0.5           | 0.16 $\pm$ 0.03          | 0.010 $\pm$ 0.002 | -                 | -                 | 6, 7   |
| Control juvenile <i>Abcd1(y/-)</i> (chow) | 12 weeks | 5 | 15.6 $\pm$ 0.3           | 2.22 $\pm$ 0.05          | 0.143 $\pm$ 0.005 | -                 | -                 | 6, 7   |
| Sobetirome juvenile (0.4 mg/kg chow)      | 12 weeks | 4 | 17.4 $\pm$ 0.7           | 1.04 $\pm$ 0.19          | 0.059 $\pm$ 0.007 | <0.0001           | **                | 6      |
| Sobetirome juvenile (2.0 mg/kg chow)      | 11 weeks | 4 | 16.7 $\pm$ 1.3           | 0.91 $\pm$ 0.15          | 0.054 $\pm$ 0.006 | <0.0001           | **                | 6      |
| Sobetirome juvenile (0.4 mg/kg chow)      | 18 weeks | 2 | 17.8 $\pm$ 0.3           | 1.16 $\pm$ 0.02          | 0.065 $\pm$ 0.002 | 0.0004            | **                | 6      |
| Sobetirome adult (0.4 mg/kg chow)         | 12 weeks | 5 | 15.5 $\pm$ 1.1           | 1.19 $\pm$ 0.17          | 0.076 $\pm$ 0.008 | 0.0001            | **                | 7      |
| Sobetirome adult (2.0 mg/kg chow)         | 11 weeks | 7 | 16.5 $\pm$ 0.9           | 1.13 $\pm$ 0.14          | 0.067 $\pm$ 0.005 | <0.0001           | **                | 7      |

47  
 48  
 49

49 **Supplemental Table 6.** Sobetirome levels in blood and brain. Values represent mean  $\pm$  SEM (N). Sobetirome was measured in serum and brain  
 50 samples from the terminus of the 28 Day i.p. dosing and 12 week chow dosing experiments using LC-MS/MS following previously published  
 51 methodology (37) with the following modifications. The serum sample (25  $\mu$ l) was extracted with 125  $\mu$ l acetonitrile and an extracted standard  
 52 curve ranging from 1 – 2000 ng/ml was prepared in control serum. The brain homogenate (125  $\mu$ l, 200 mg tissue/ml) was extracted with 500  $\mu$ l of  
 53 acetonitrile and an extracted standard curve ranging from 1 – 100 ng/g tissue was prepared in control brain homogenate. \*Values are outside of  
 54 standard curve.

55

|                     | <b>28 Day 0.1 mg/kg<br/>sobetirome i.p.</b> | <b>28 Day 1.0 mg/kg<br/>sobetirome i.p.</b> | <b>12 week 0.4 mg/kg<br/>sobetirome chow</b> | <b>12 week 2 mg/kg<br/>sobetirome chow</b> |
|---------------------|---------------------------------------------|---------------------------------------------|----------------------------------------------|--------------------------------------------|
| Brain (ng/g tissue) | 1.1 $\pm$ 0.7 (4)                           | 4.5 $\pm$ 3.0 (3)                           | 0.3 $\pm$ 0.1* (3)                           | 4.0 $\pm$ 0.7 (11)                         |
| Serum (ng/ml)       | 19.0 $\pm$ 3.8 (5)                          | 102.2 $\pm$ 12.0 (5)                        | 13.3 $\pm$ 1.7 (7)                           | 87.0 $\pm$ 13.6 (14)                       |
| Brain/Serum         | 0.09 $\pm$ 0.07 (4)                         | 0.04 $\pm$ 0.02 (3)                         | 0.02 $\pm$ 0.01 (3)                          | 0.07 $\pm$ 0.01 (11)                       |

56
